# Supplementary material for: Facile route for C–N/Nb2O5 nanonet synthesis based on 2-methylimidazole for visible-light driven photocatalytic degradation of Rhodamine B
Source: Royal Society of Chemistry journal article supplement (doi:10.1039/c9ra07505d), 2019-01-01
Supplement: c9ra07505d1.pdf [file c9ra07505d1.pdf]

# Supporting Information

## Facile route for C-N/Nb<sub>2</sub>O<sub>5</sub> nanonets synthesis-based 2-methylimidazole for visible-light driven photocatalytic degradation of Rhodamine B

Fahim A. Qaraah,<sup>a</sup> Samah A. Mahyoub,<sup>a</sup> Mahmoud Elsayed Hafez <sup>\*b</sup> and Guangli Xiu <sup>\*a</sup>

<sup>a</sup>*State Environmental Protection Key Lab of Environmental Risk Assessment and Control on Chemical Processes, School of Resources & Environmental Engineering, East China University of science and technology, Shanghai 200237, China*

<sup>b</sup>*Department of Chemistry, Faculty of Science, Beni-Suef University, Beni-Suef 62511, Egypt*

### Corresponding Authors:

\* [mahmoud.hafez@science.bsu.edu.eg](mailto:mahmoud.hafez@science.bsu.edu.eg)

\* [xiugl@ecust.edu.cn](mailto:xiugl@ecust.edu.cn)

### Table of Contents

|                                 |   |
|---------------------------------|---|
| <b>SUPPORTING FIGURES</b> ..... | 1 |
| Supporting Figure S1 .....      | 1 |
| Supporting Figure S2 .....      | 2 |
| Supporting Figure S3 .....      | 3 |
| Supporting Figure S4 .....      | 4 |
| Supporting Figure S5 .....      | 5 |
| Supporting Figure S6 .....      | 5 |
| Supporting Figure S7 .....      | 6 |

## SUPPORTING FIGURES

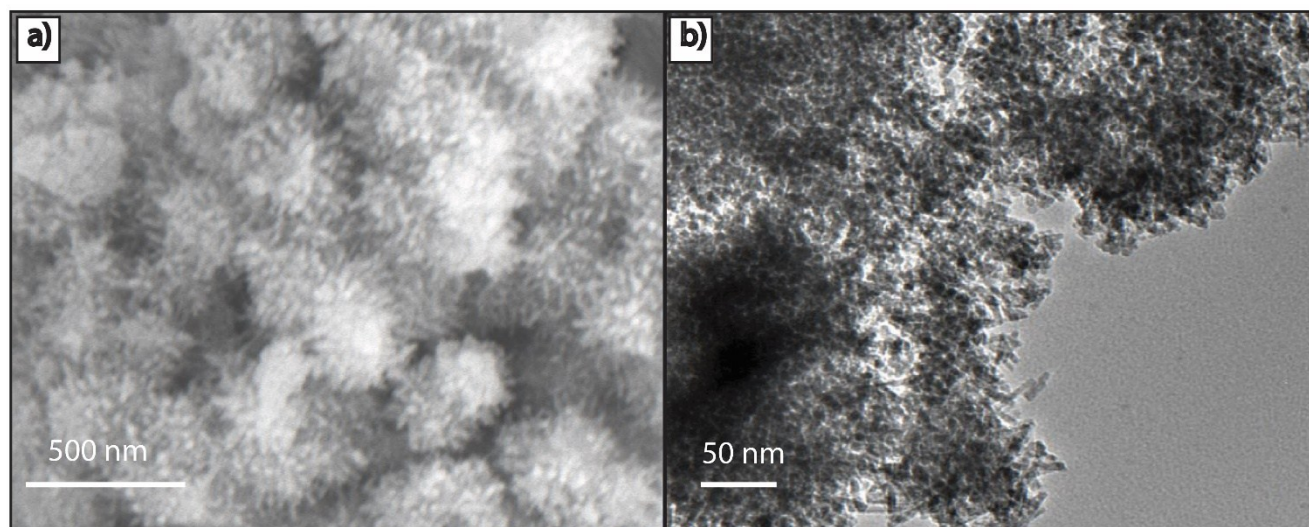

**Figure S1.** (a) SEM and (b) TEM images of Nb<sub>2</sub>O<sub>5</sub>-CS at calcination temperature 350 °C.

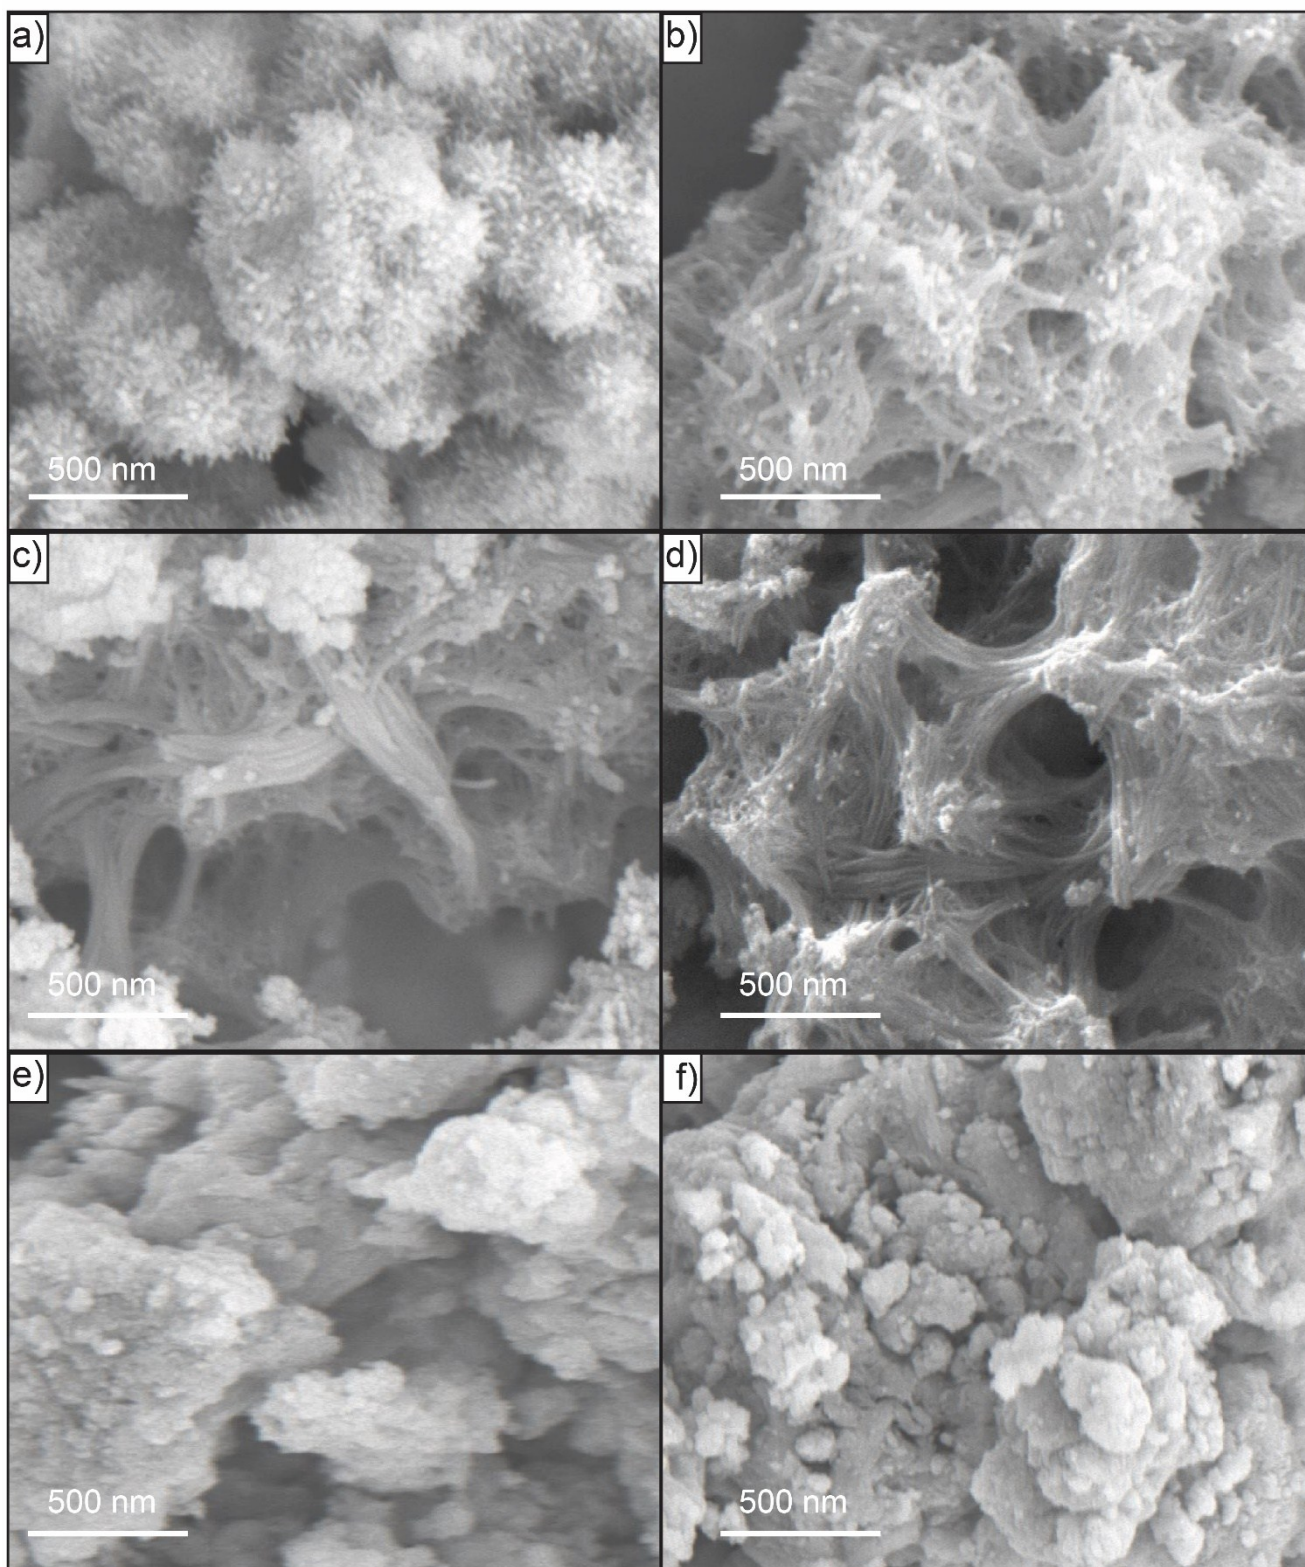

**Figure S2.** SEM images of Nb<sub>2</sub>O<sub>5</sub> nanostructures synthesized by using different concentrations of Hmim: (a) 15 mmol·L<sup>-1</sup>, (b) 30 mmol·L<sup>-1</sup>, (c) 60 mmol·L<sup>-1</sup>, (d) 90 mmol·L<sup>-1</sup>, (e) 120 mmol·L<sup>-1</sup>, and (f) 150 mmol·L<sup>-1</sup>.



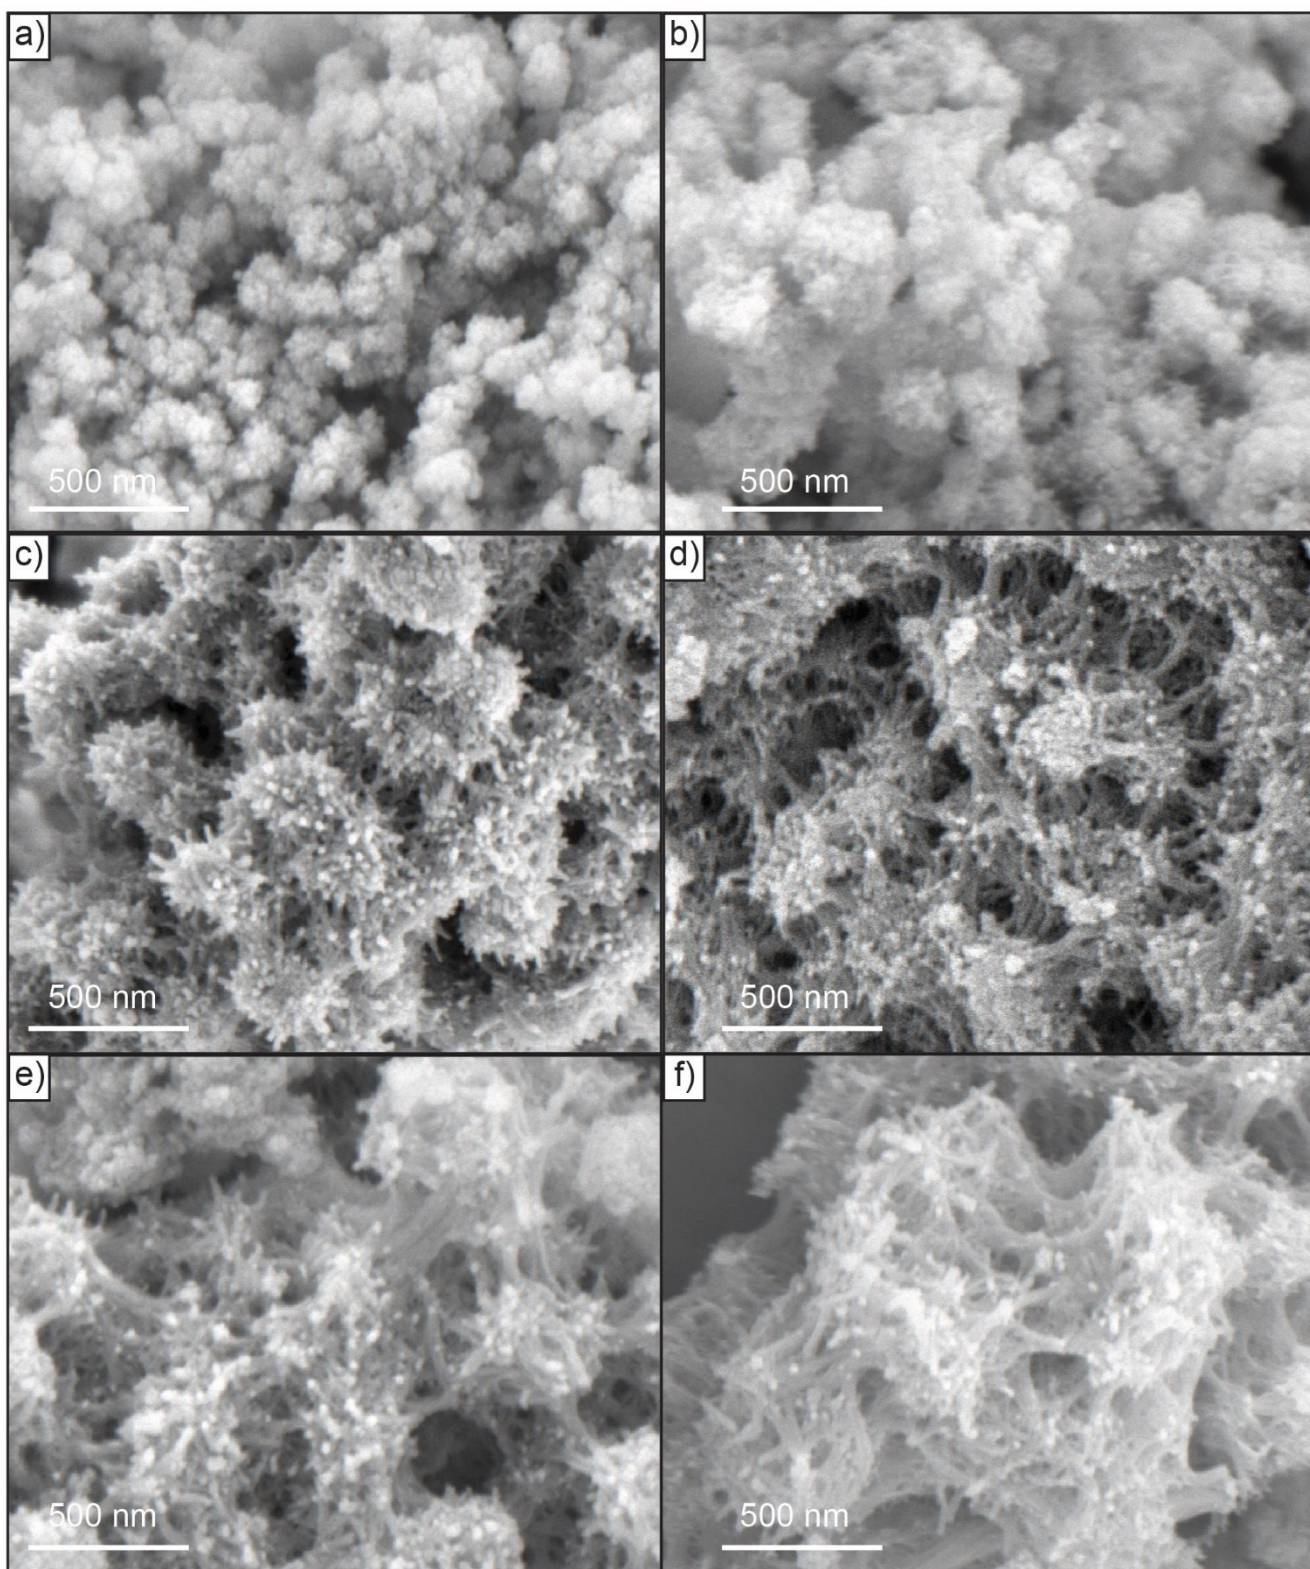

**Figure S3.** SEM images of Nb<sub>2</sub>O<sub>5</sub> nanonetstructures synthesized at different reaction periods: (a) 1 h, (b) 3 h, (c) 6 h, (d) 9 h, (e) 12 h, and (f) 24 h.



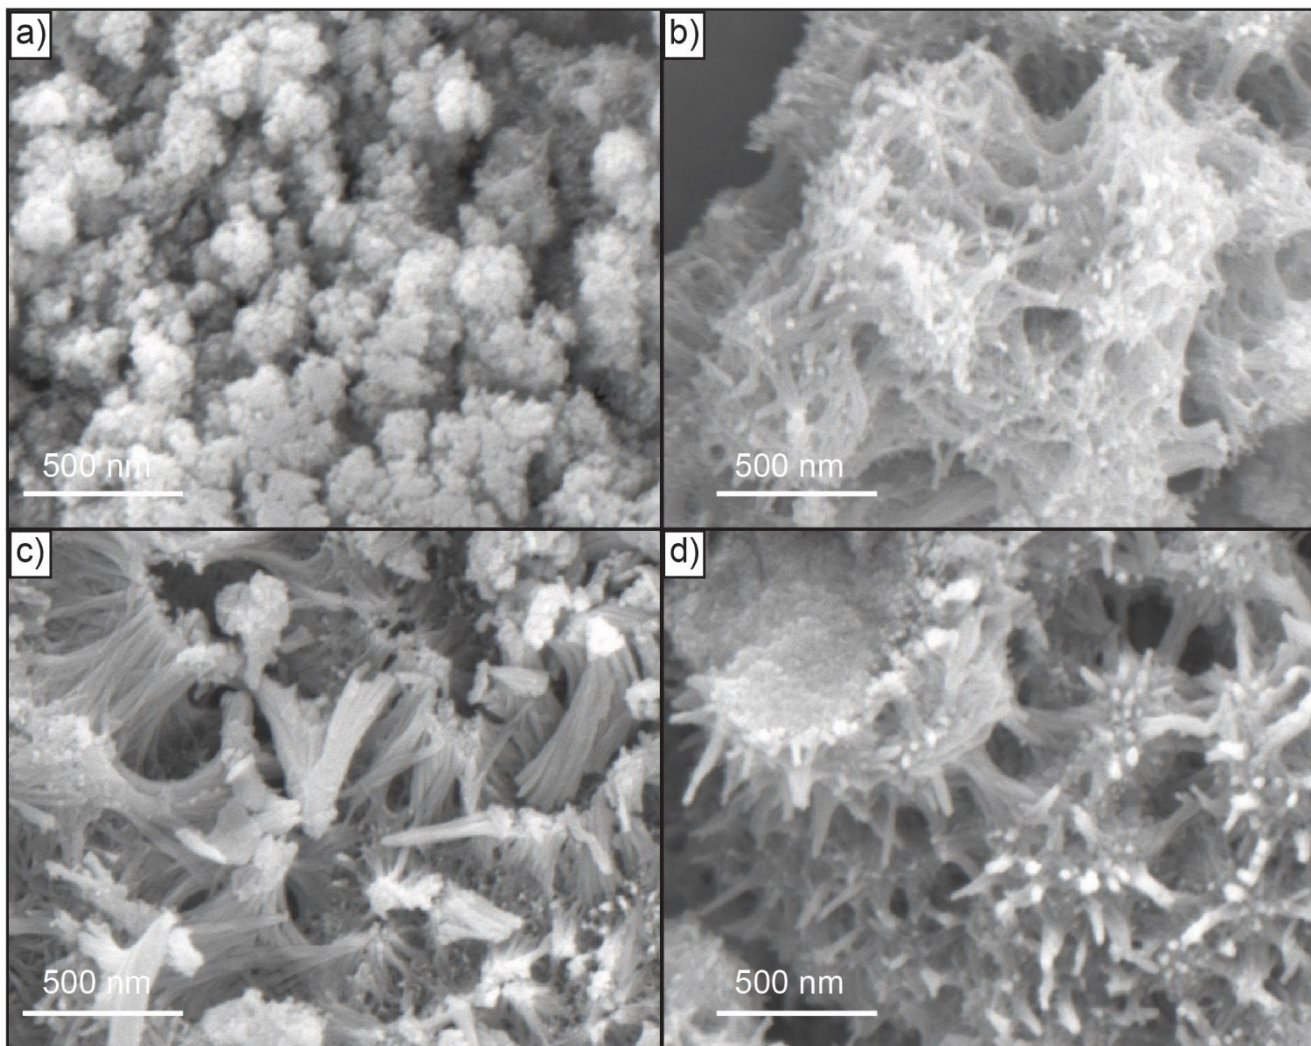

**Figure S4.** SEM images of C-N/Nb<sub>2</sub>O<sub>5</sub>NNs synthesized by using 2: 1 molar ratio of niobium oxalate: Hmim with different co-solvent volumetric ratios of water to ethanol: (a) 5:1, (b) 2:1, (c) 1:1, and (d) 1:2.

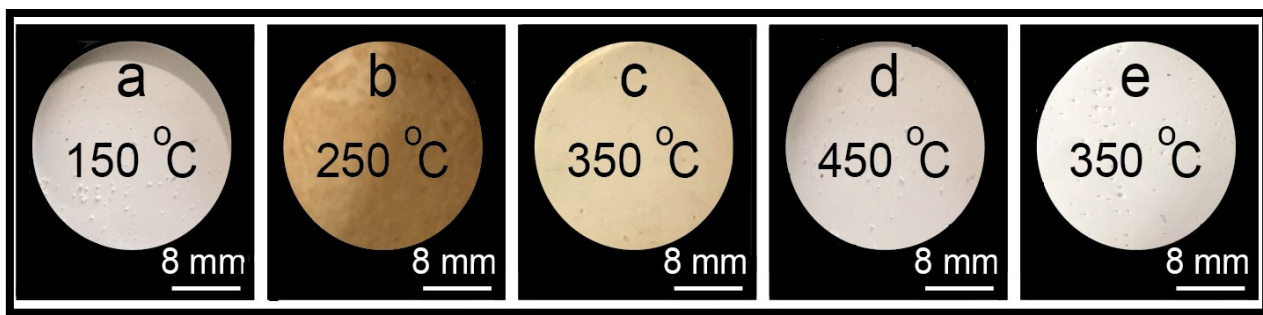

**Figure S5.** Camera images of Nb<sub>2</sub>O<sub>5</sub> nanonetstructures powder at different calcination temperatures of (a) 150 °C, (b) 250 °C, (c) 350 °C, (d) 450 °C, and (e) Nb<sub>2</sub>O<sub>5</sub>-CS at 350 °C.

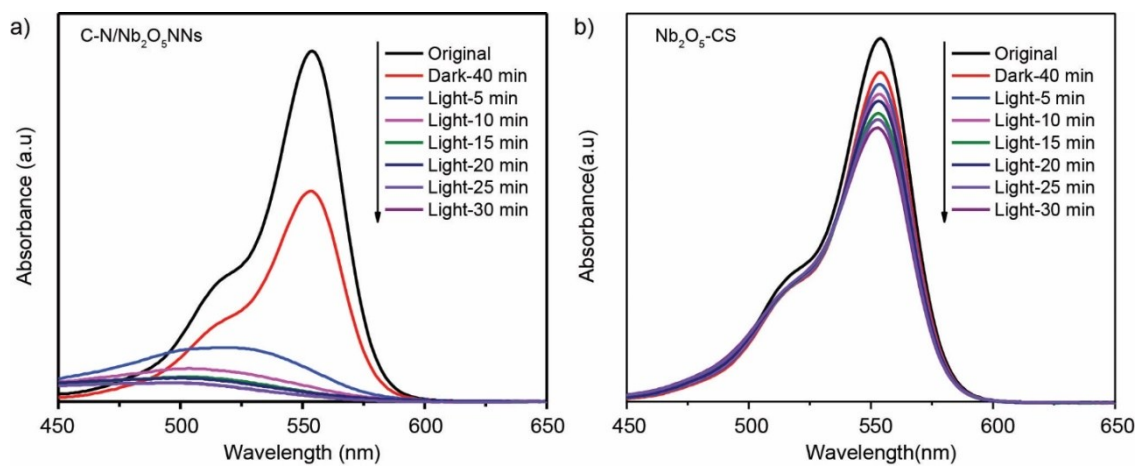

**Figure S6.** UV-vis absorption spectra changes of the RhB absorbance in aqueous solution over C-N/Nb<sub>2</sub>O<sub>5</sub>NNs (a) and Nb<sub>2</sub>O<sub>5</sub>-CS (b).

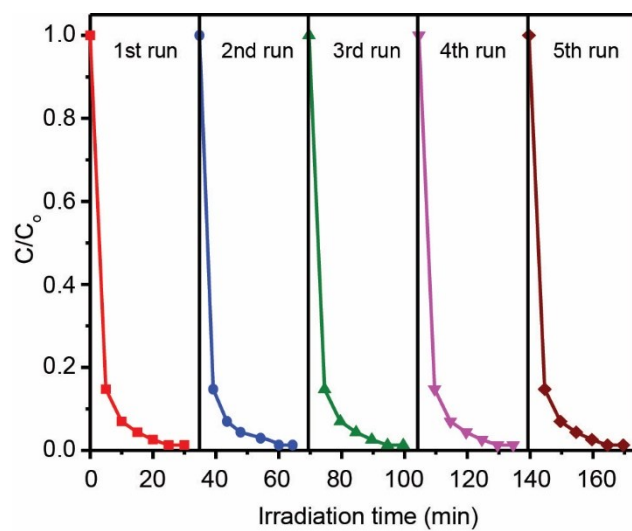

**Figure S7.** The number of cycles for the photocatalytic degradation of 10 mg/L RhB in presence of 1 g/L C–N/Nb<sub>2</sub>O<sub>5</sub>NNs.
